# Supplementary material
Source: PubMed Central journal article supplement (PMC6868887)
Supplement: ao9b02730_si_001.pdf [file ao9b02730_si_001.pdf]

## Supporting Information of

### Acid oxidation of muskmelon fruit for the fabrication of carbon dots with specific emission color for recognition of $\text{Hg}^{2+}$ ion and cells imaging

Mittal L. Desai<sup>a</sup>, Sanjay Jha<sup>b</sup>, Hirakendu Basu<sup>c</sup>, Rakesh Kumar Singhal<sup>c</sup>, Tae-Jung Park<sup>d</sup> and Suresh Kumar Kailasa<sup>a\*</sup>

<sup>a</sup>Department of Applied Chemistry, S. V. National Institute of Technology, Surat-395 007, India

<sup>b</sup>Gujarat Agricultural Biotechnology Institute, Navsari Agricultural University, Surat-395007, India

<sup>c</sup>Analytical Chemistry Division, Bhabha Atomic Research Center, Trombay, Mumbai 400085, India

<sup>d</sup>Department of Chemistry, Institute of Interdisciplinary Convergence Research, Research Institute of Halal Industrialization Technology, Chung-Ang University, 84 Heukseok-ro, Dongjak-gu, Seoul, 06974, Republic of Korea

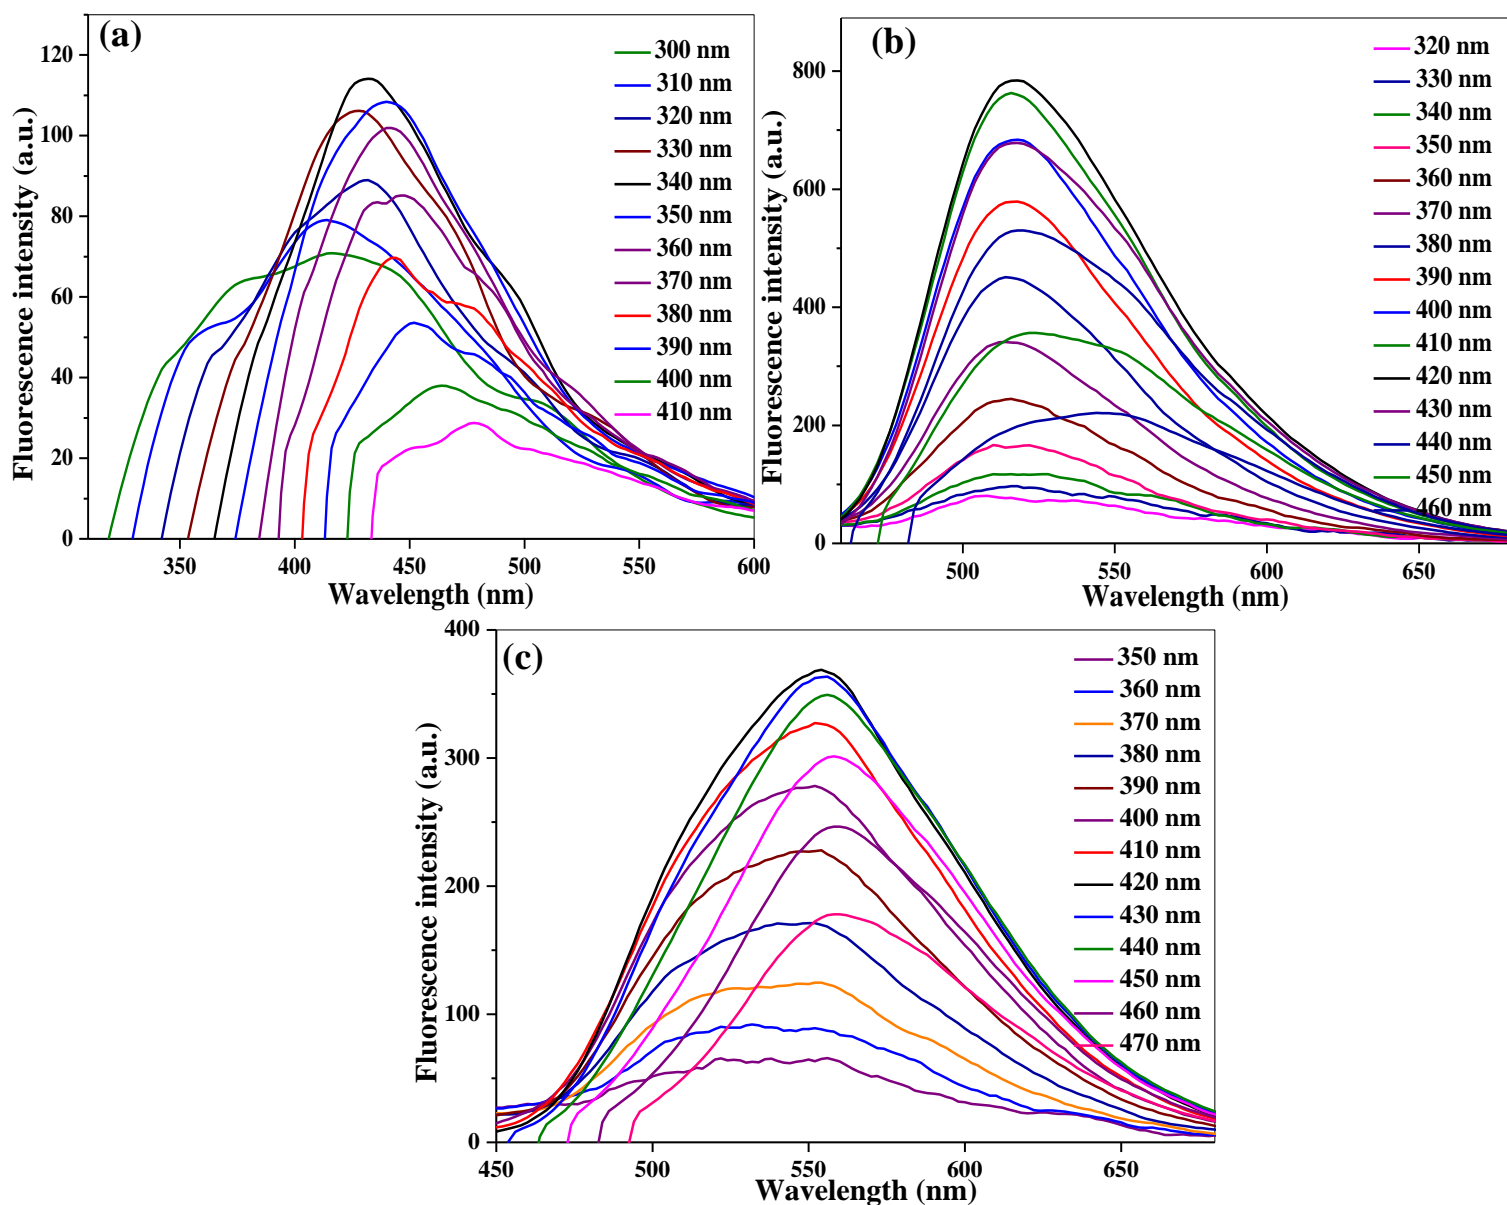

**Figure S1.** Emission spectra of (a) B- (b) G- and (c) Y- CMCDs at different excitation wavelengths.

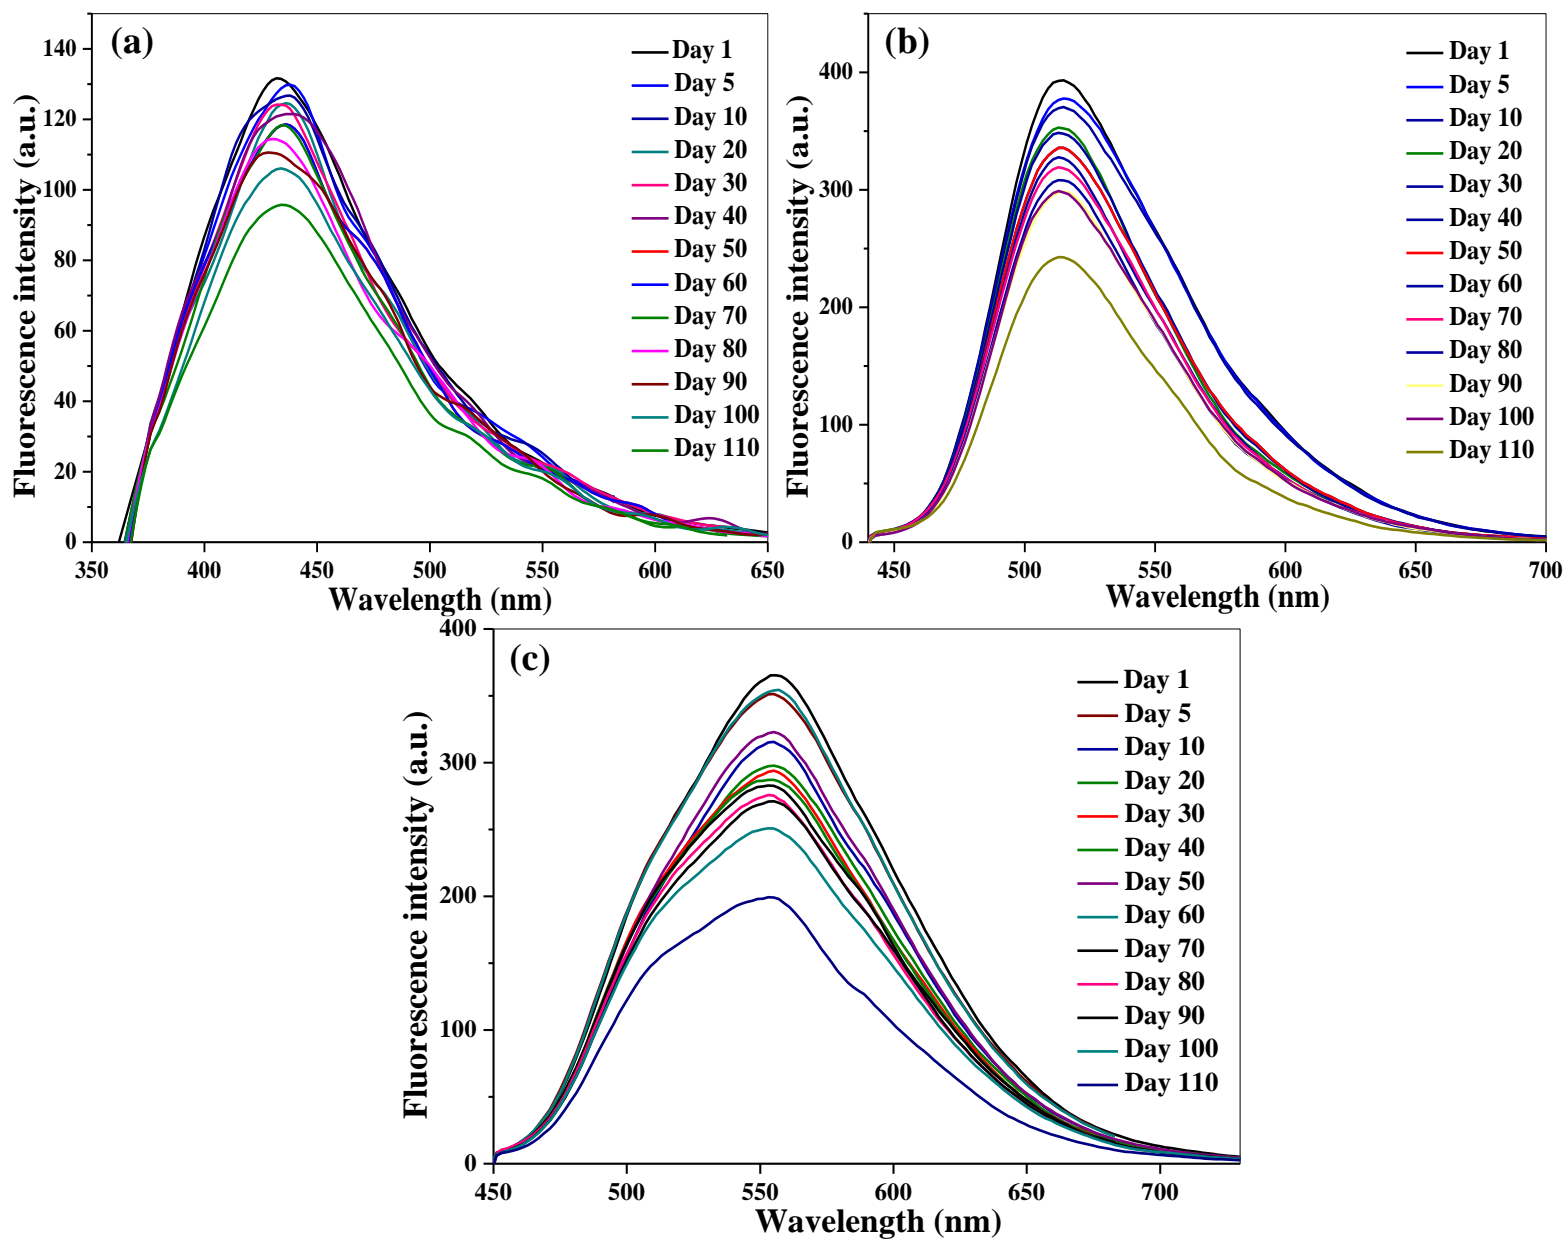

**Figure S2.** Fluorescence emission spectra of (a) B- (b) G- and (c) Y- CMCDs measured from 1 to 110 days.

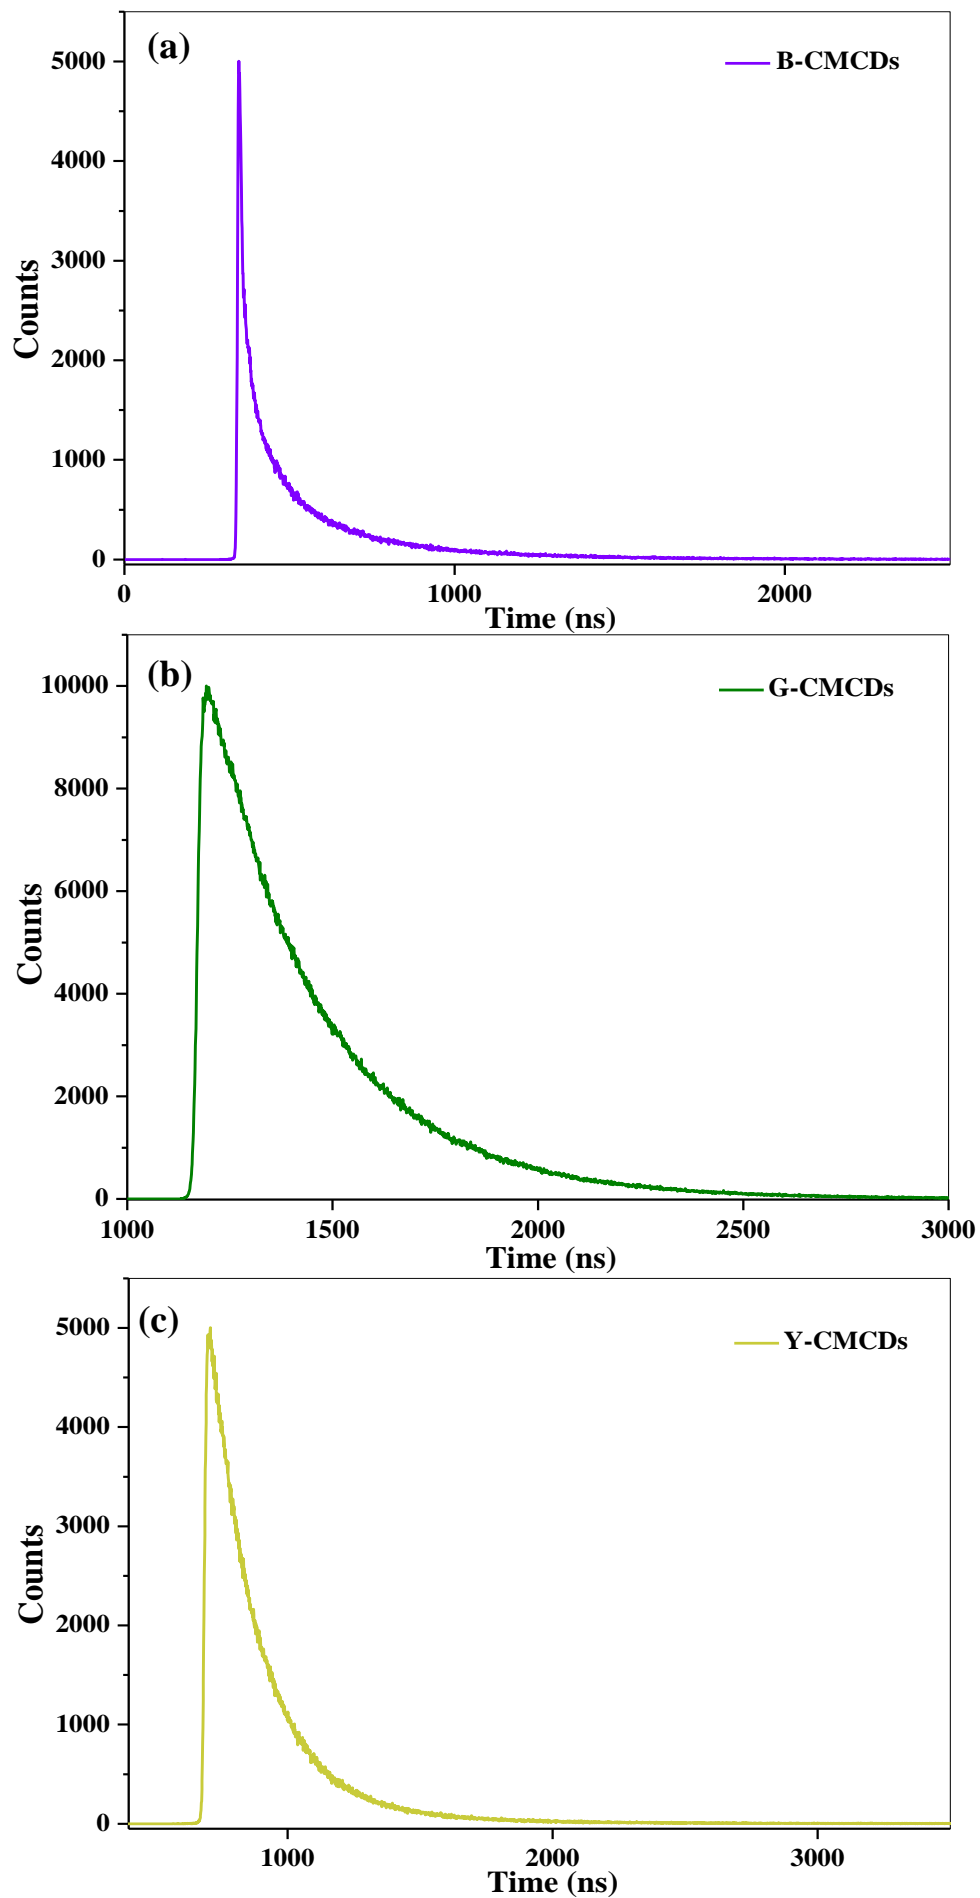

**Figure S3.** Fluorescence life time measurement of (a) B- (b) G- and (c) Y –CMCDs.

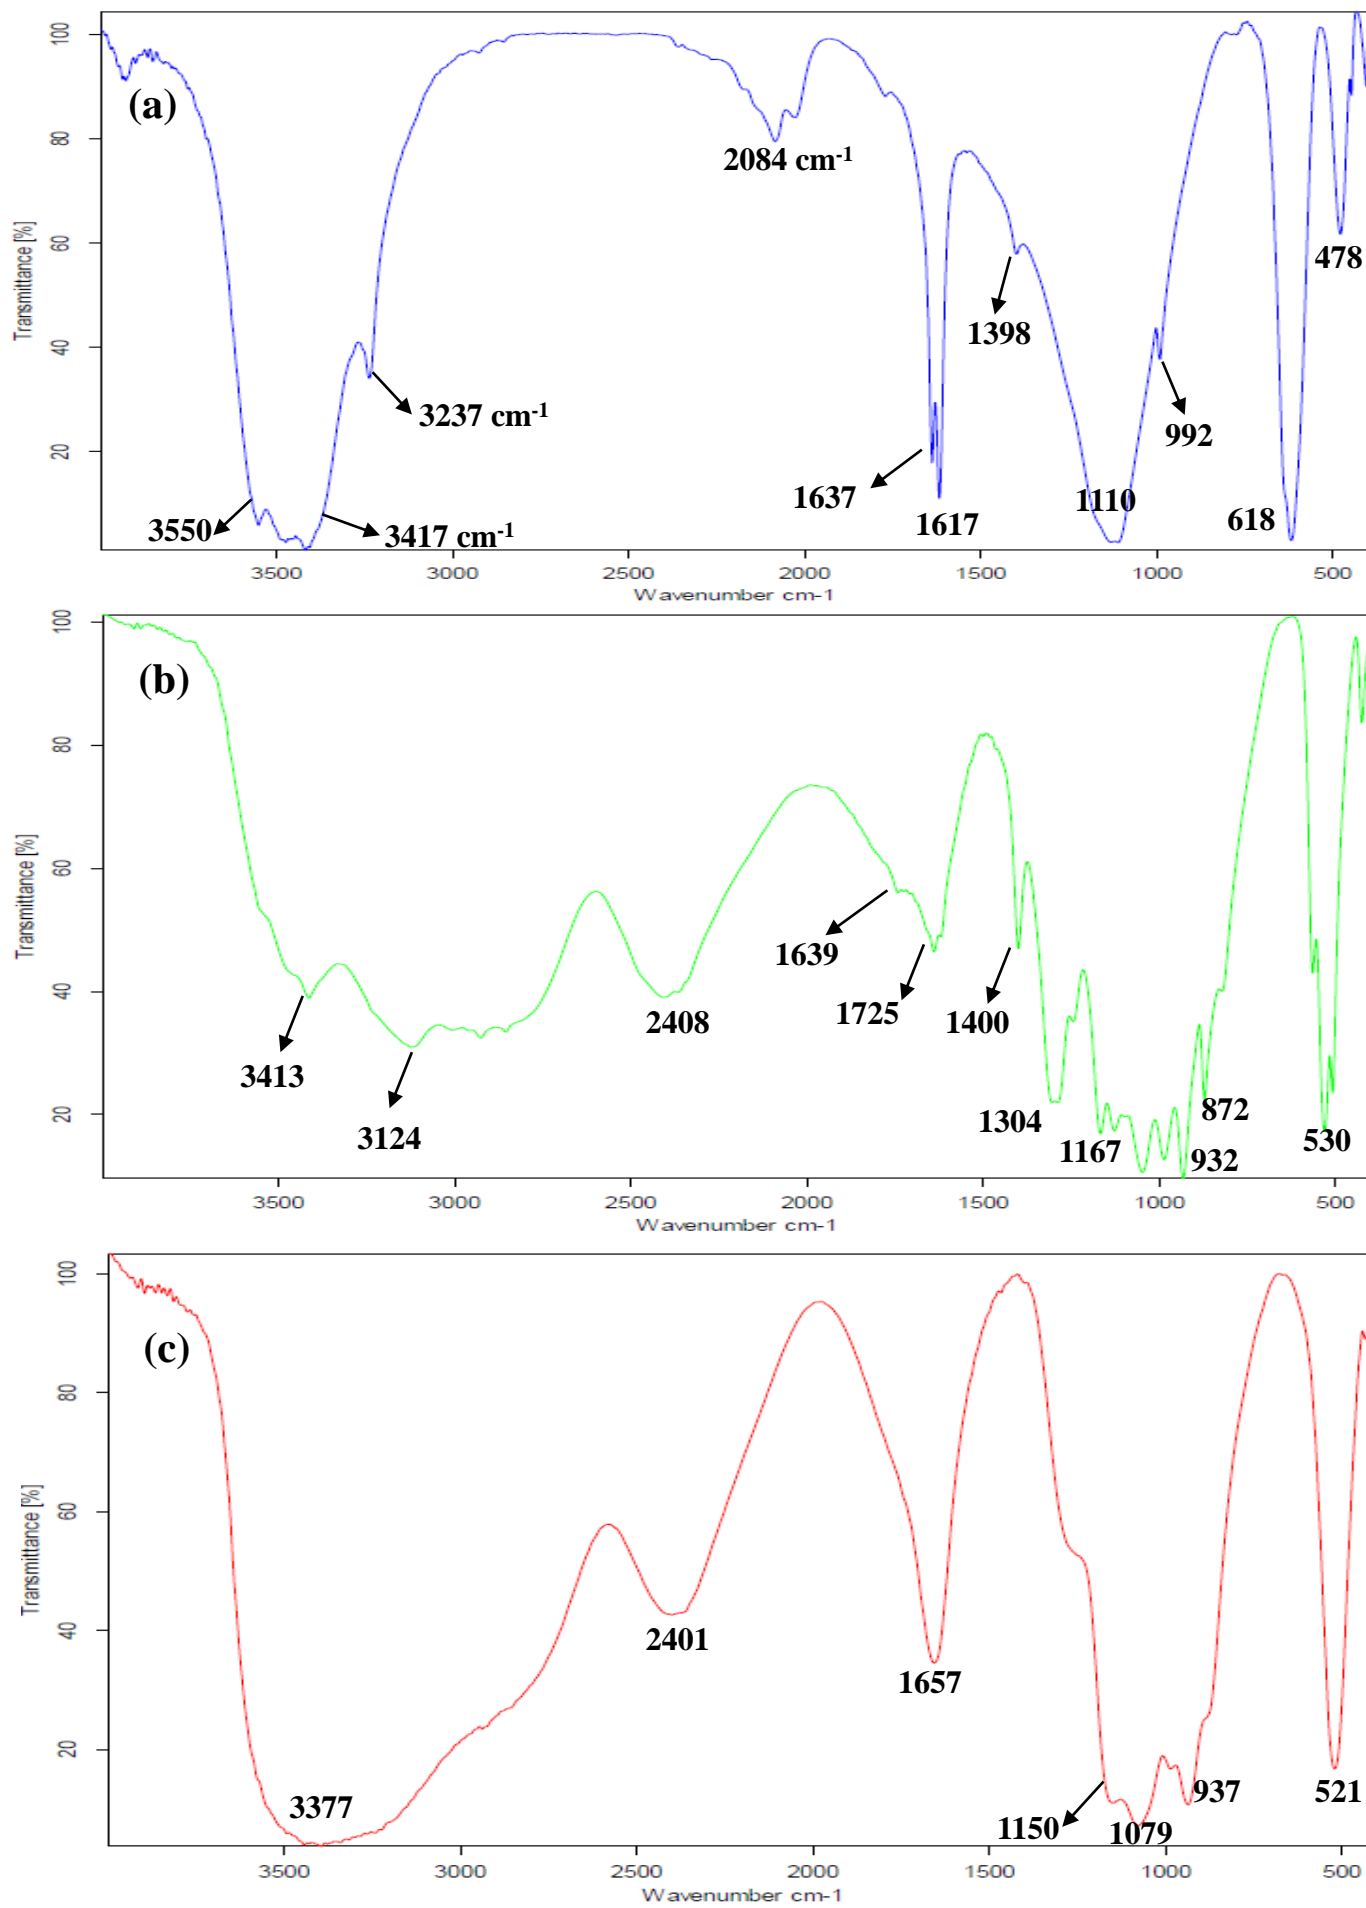

Figure S4. FT-IR spectra of (a) B- (b) G - and (c) Y-CMCDs.

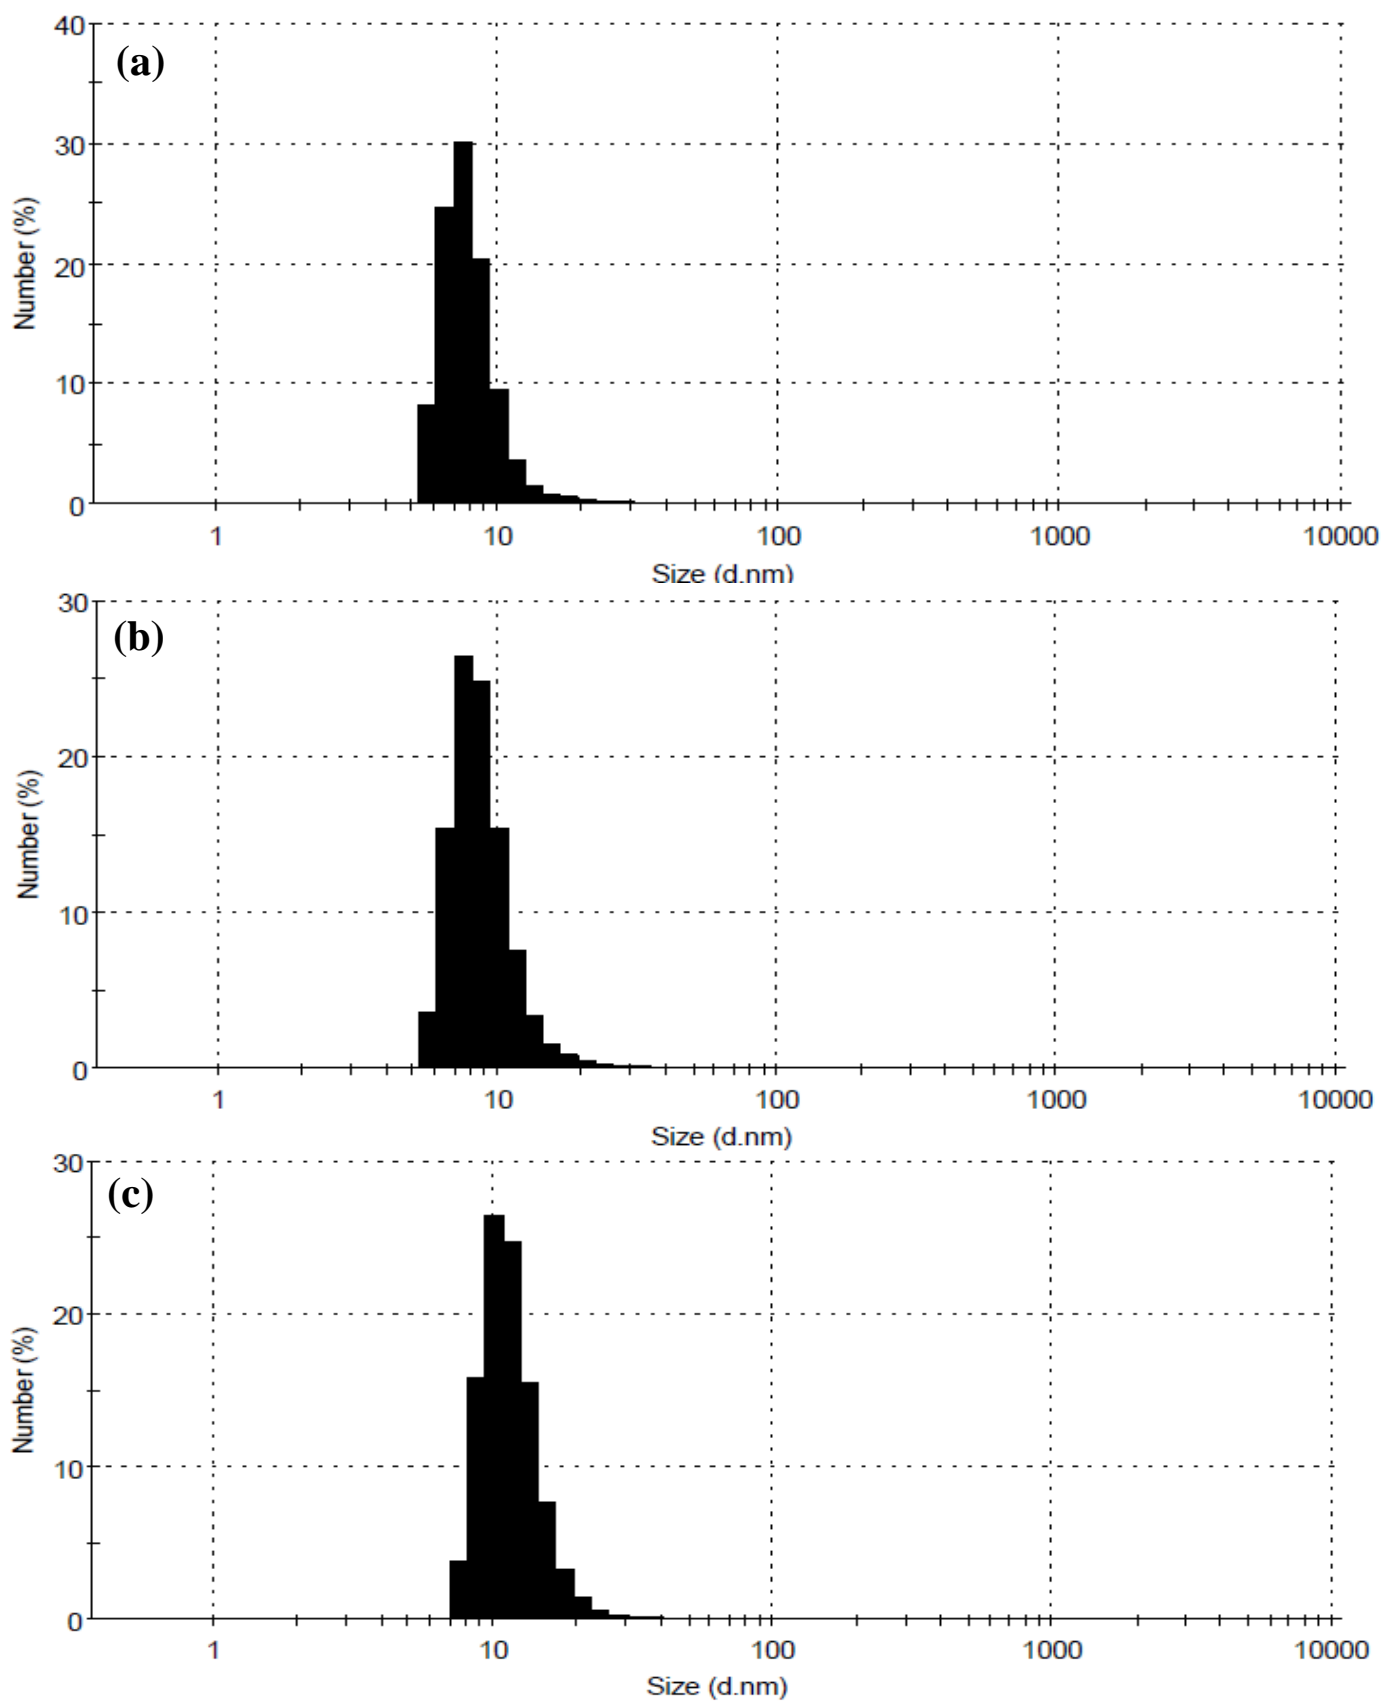

**Figure S5.** Dynamic light scattering measurement of (a) B- (b) G- and (c) Y -CMCDs.

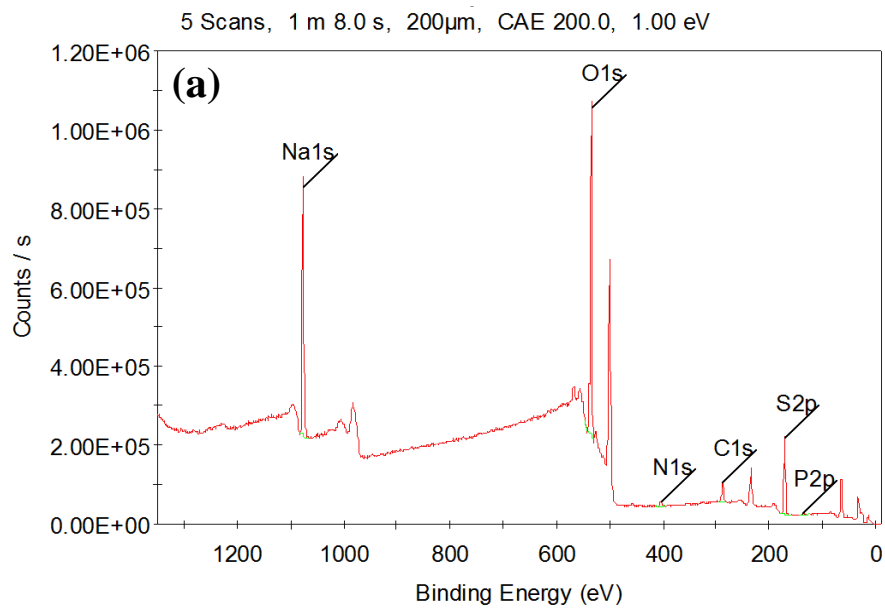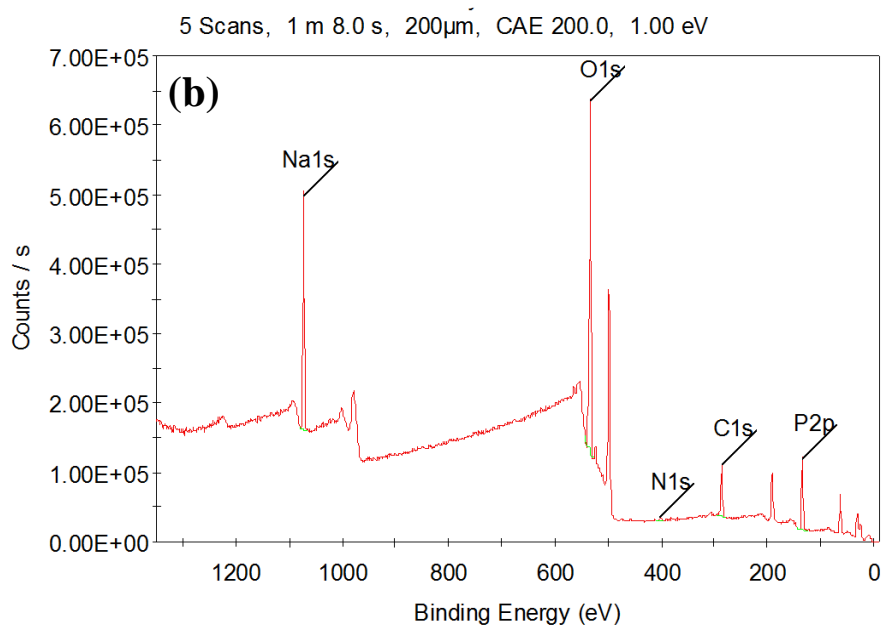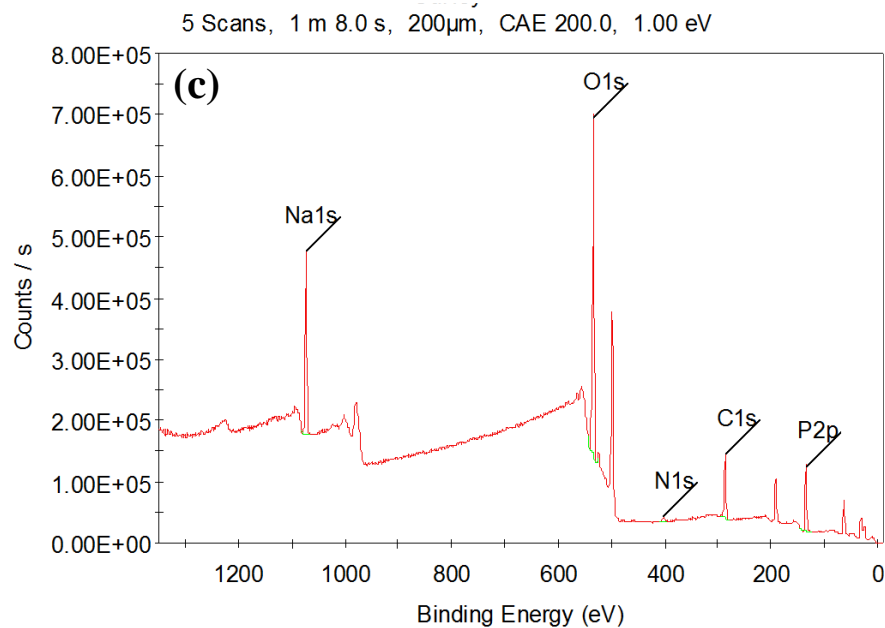

**Figure S6.** XPS survey of (a) B- (b) G- and (c) Y -CMCDs.

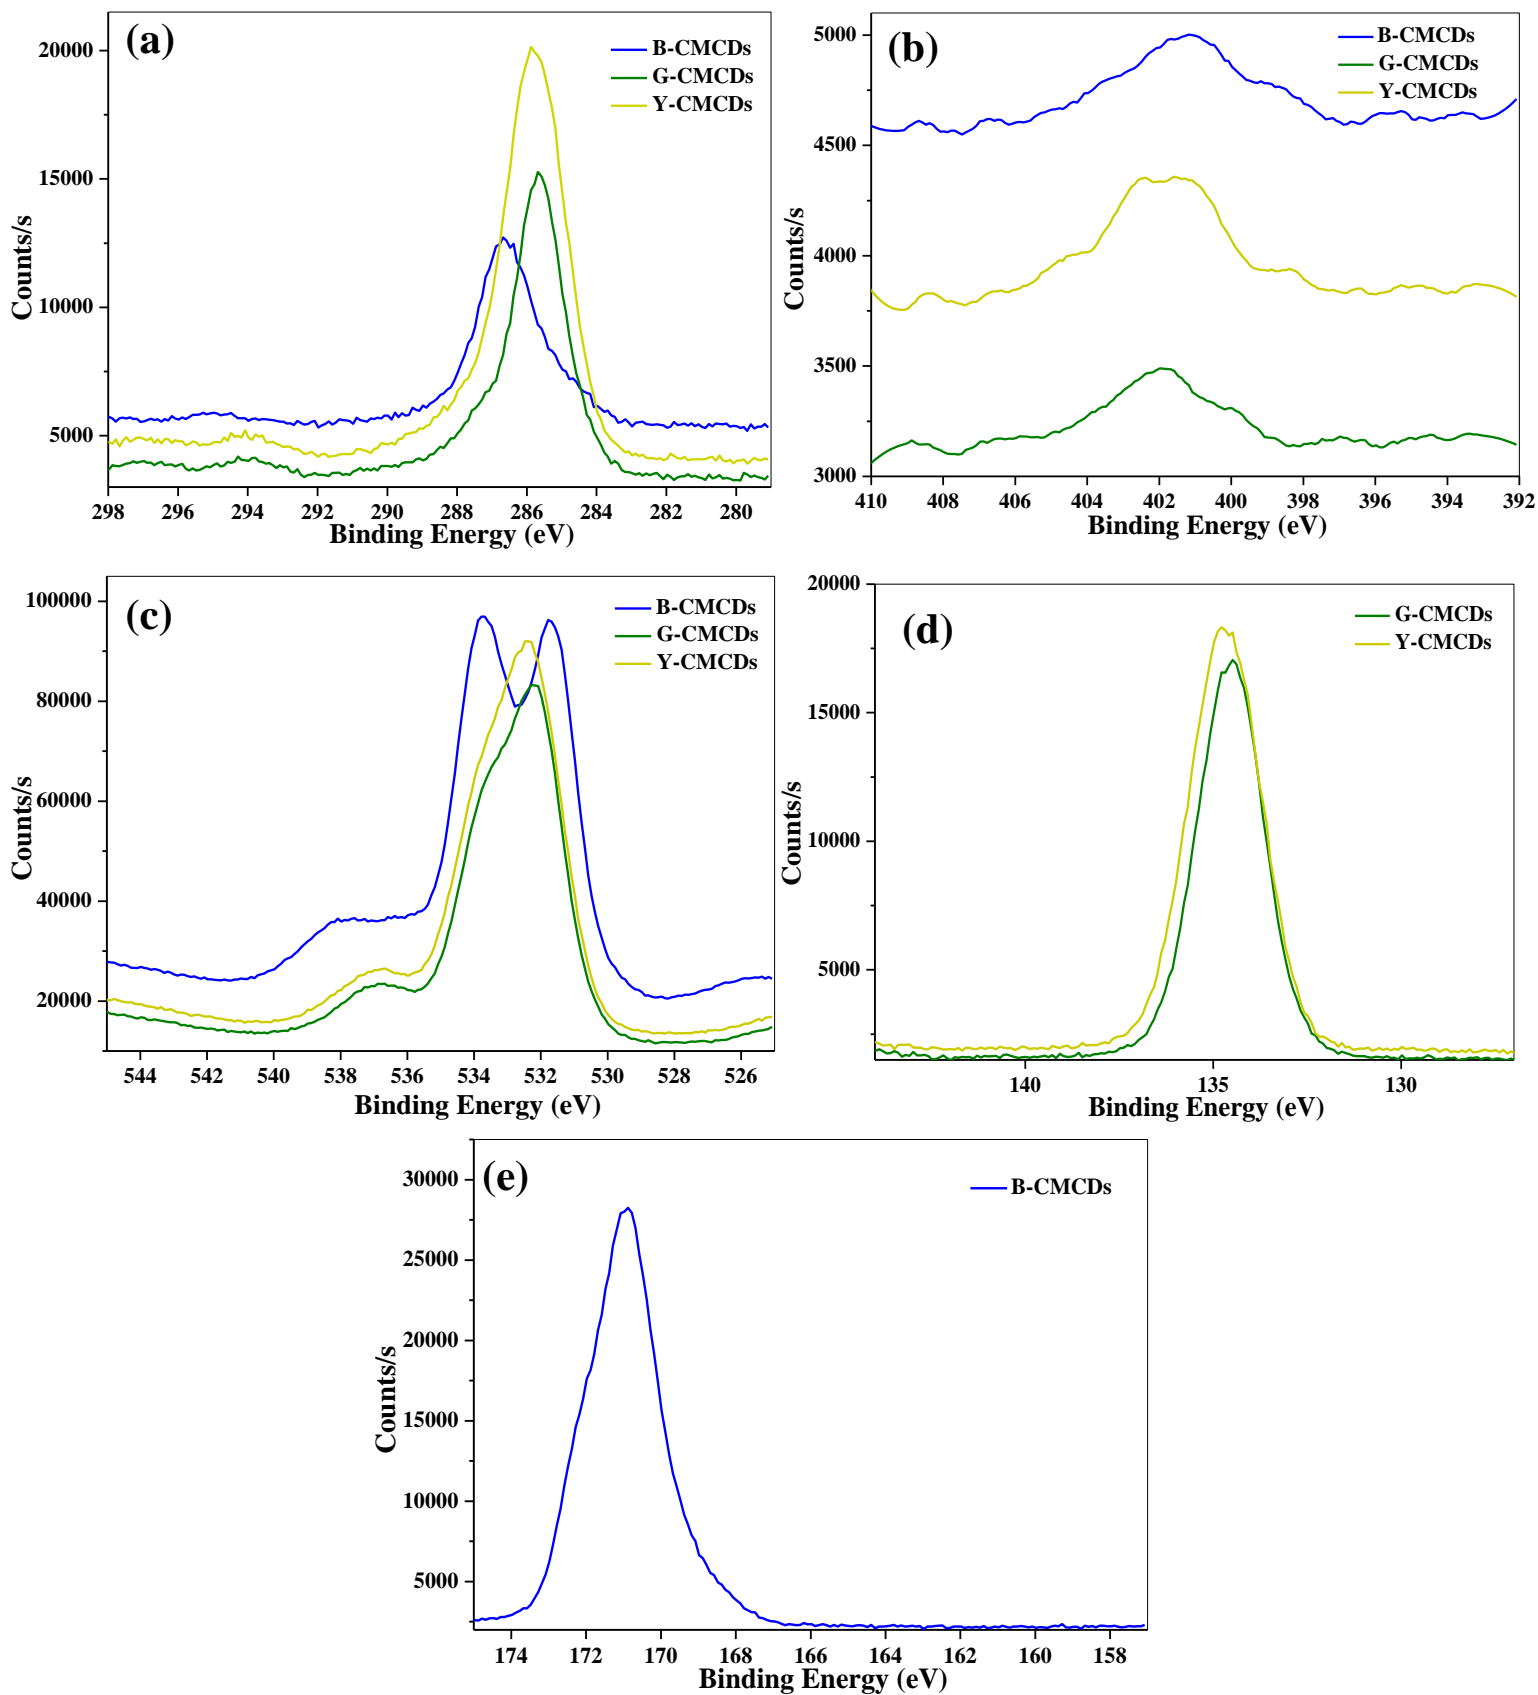

**Figure S7.** High resolution XPS data of (a) C 1s (b) N 1s (c) O 1s for three CMCDs, (d) P 2p XPS peaks for G- and Y- CMCDs and (e) S 2p XPS for B - CMCDs.

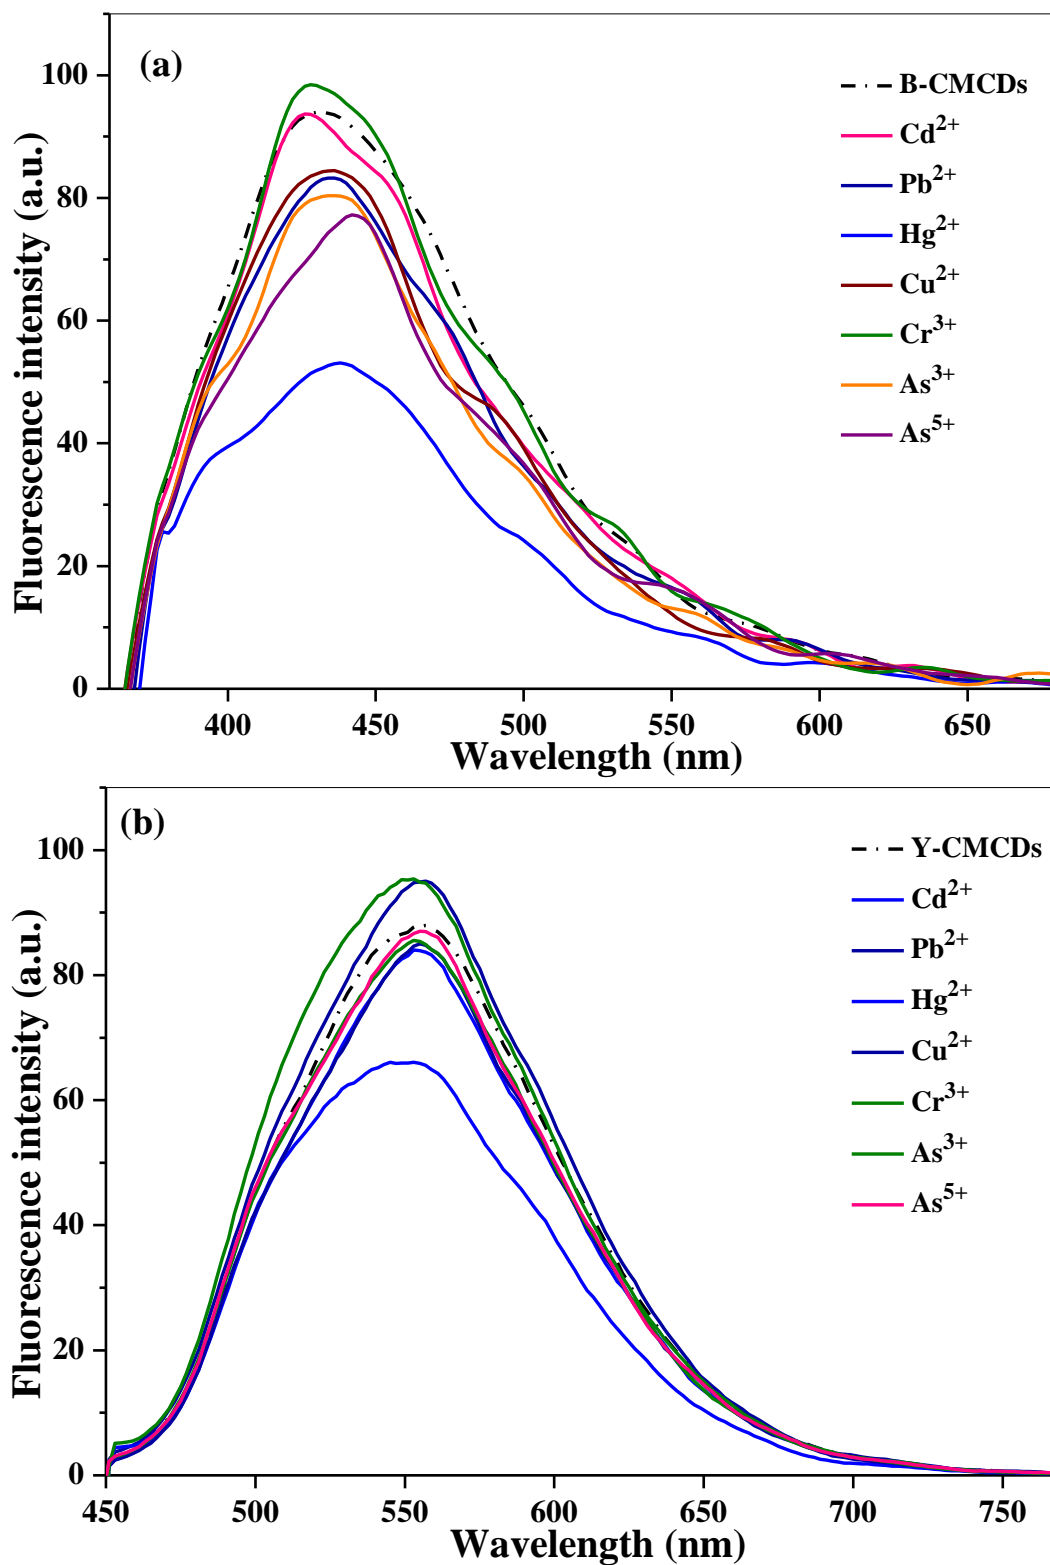

**Figure S8.** The behaviour of different metal ions (Cd<sup>2+</sup>, Pb<sup>2+</sup>, Hg<sup>2+</sup>, Cu<sup>2+</sup>, Cr<sup>3+</sup>, As<sup>3+</sup> and As<sup>5+</sup>, 500  $\mu$ M) on (a) B-and (b) Y - CMCDs (shown with dotted black line).



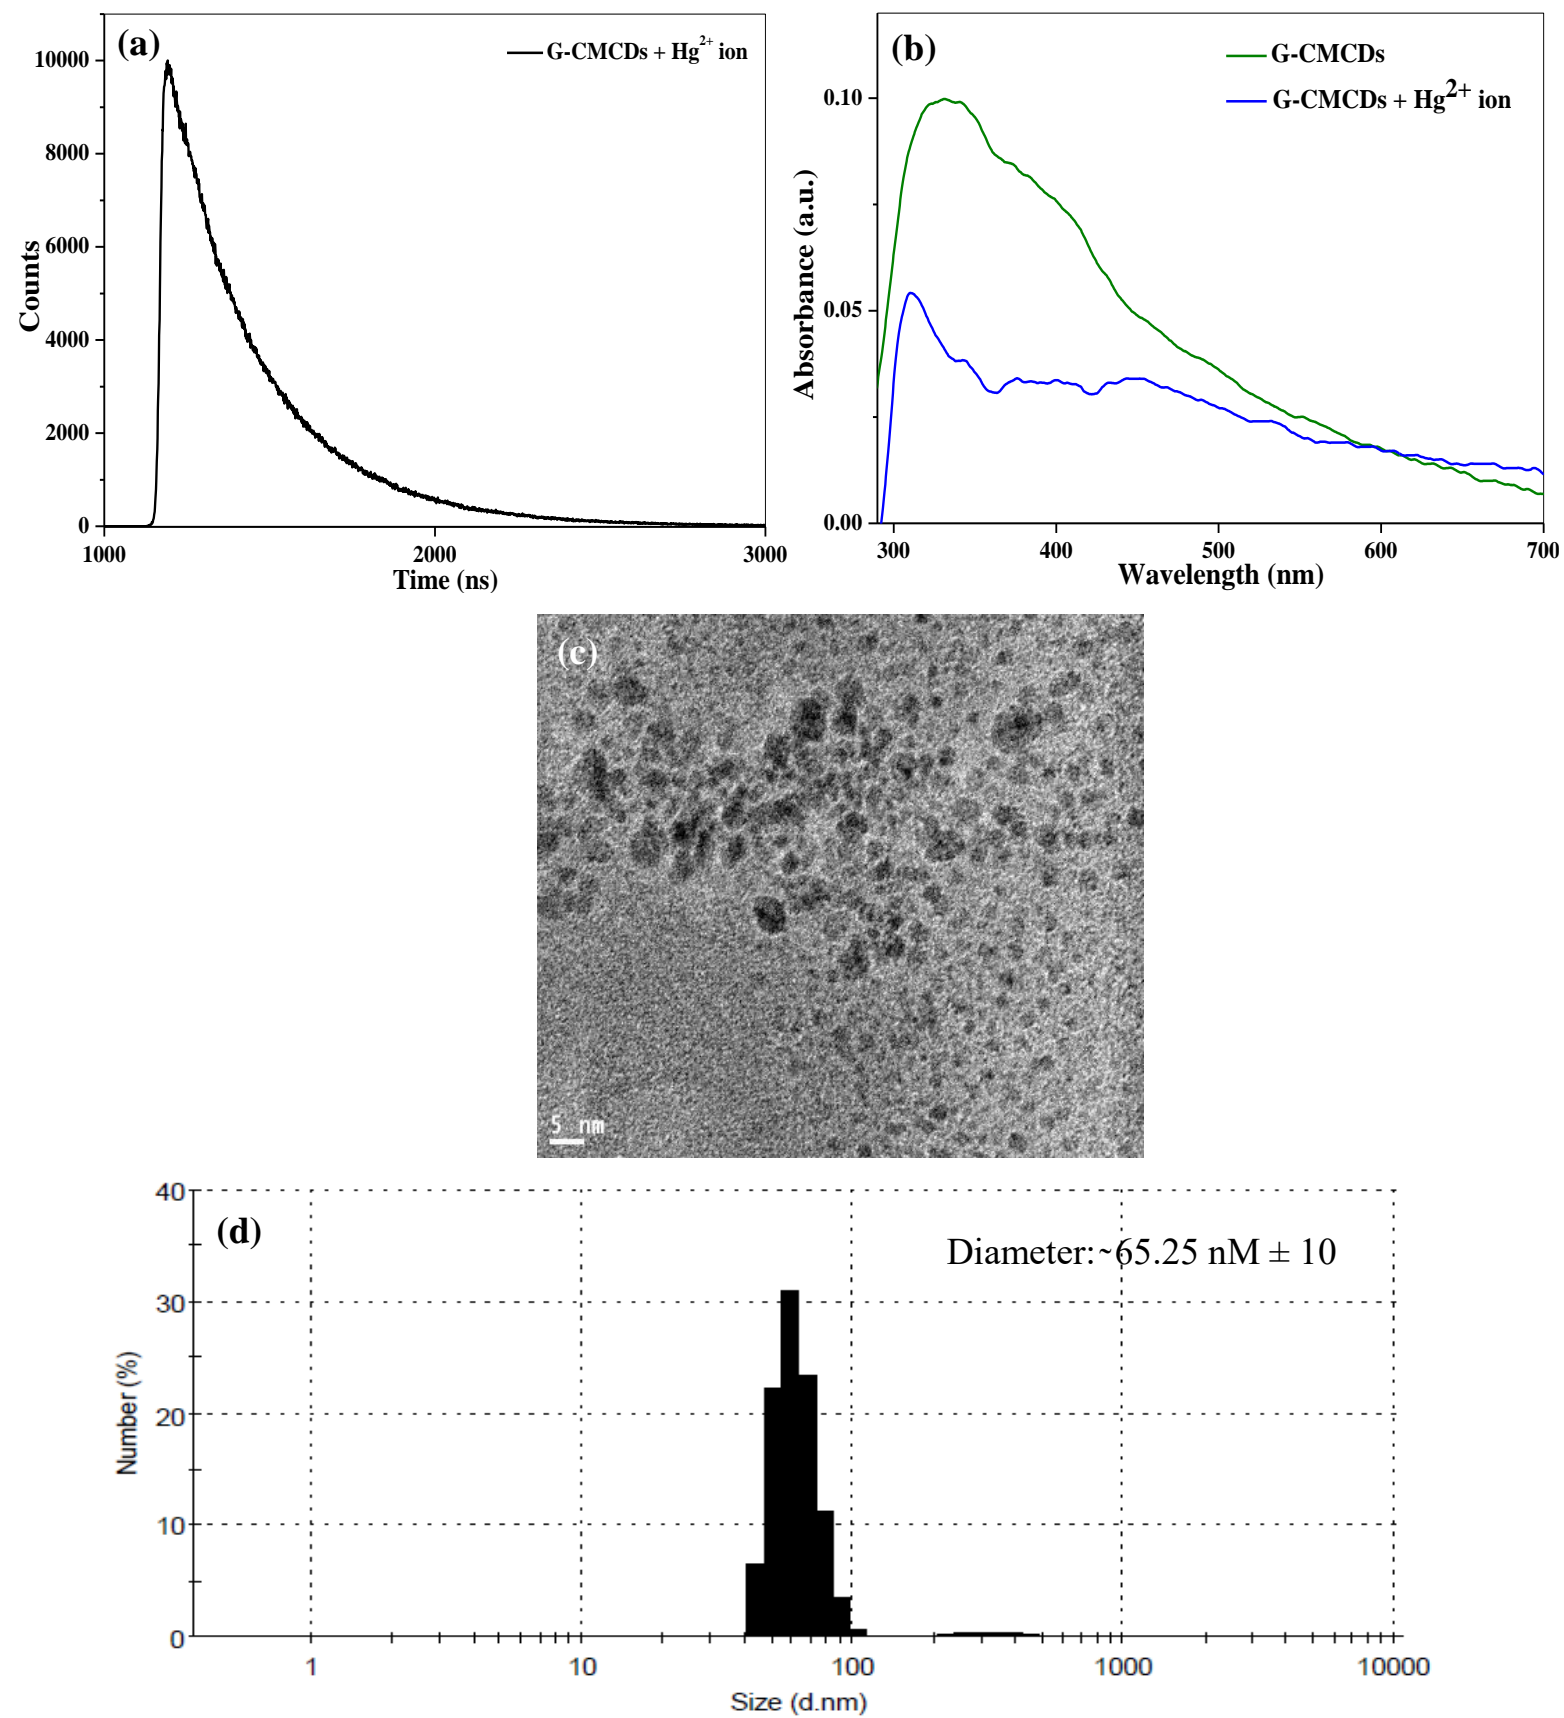

**Figure S9.** (a) Fluorescence life time (b) UV-visible absorption (c) high resolution transmission electron microscopy and (d) DLS data of G-CMCDs with Hg<sup>2+</sup>.

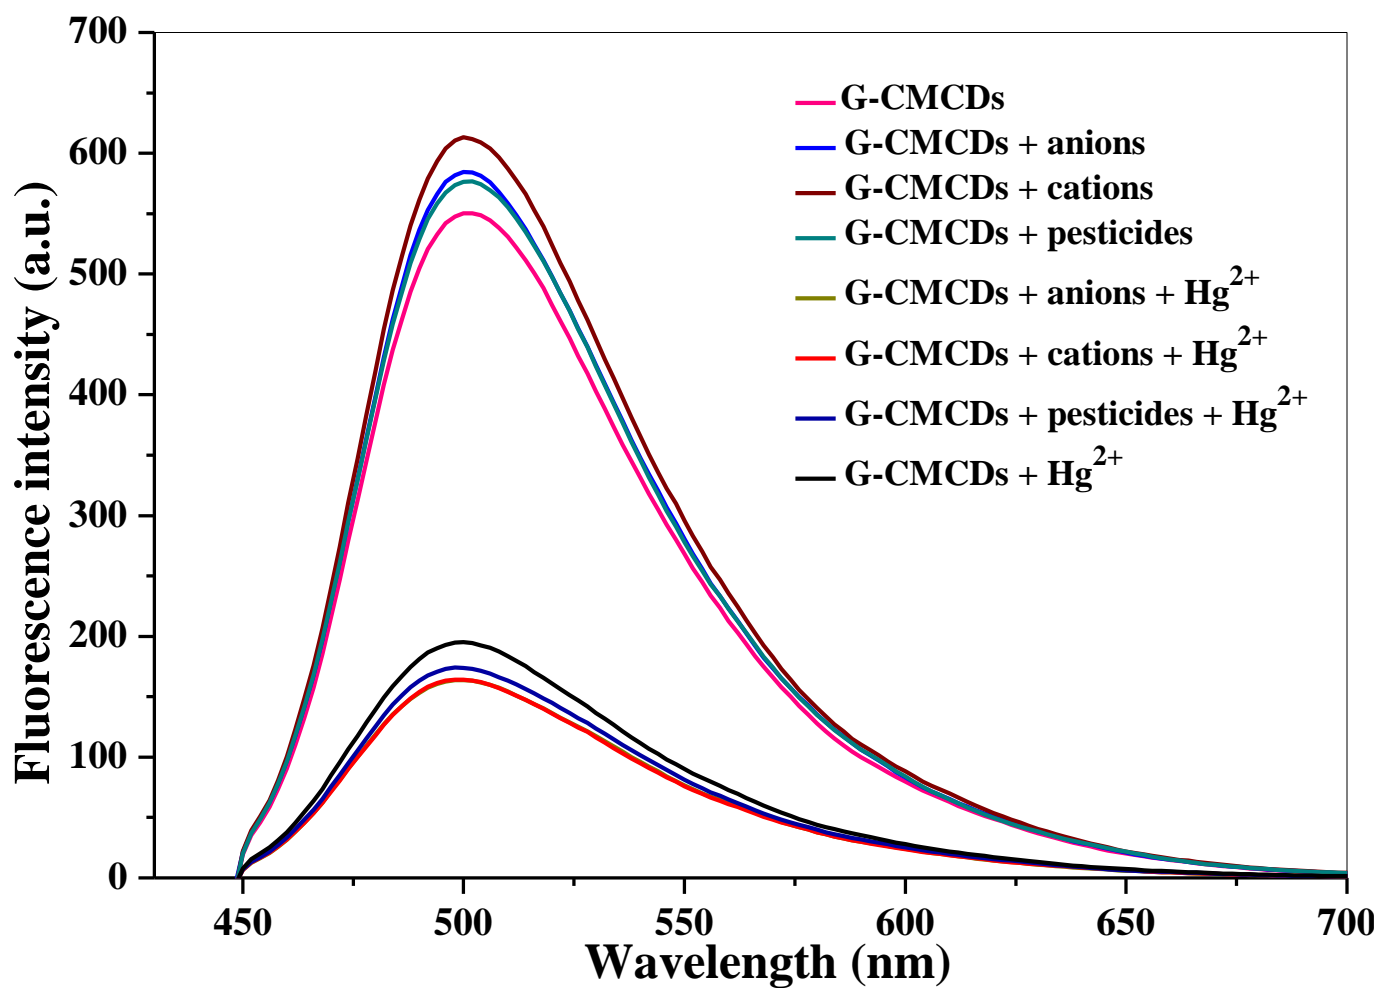

**Figure S10.** Emission spectra of G –CMCDs in the presence of mixture of anions ( $\text{Cl}^-$ ,  $\text{S}^{2-}$ ,  $\text{CH}_3\text{COO}^-$ ,  $\text{PO}_4^{3-}$ ,  $\text{NO}_3^-$  and  $\text{Cr}_2\text{O}_7^{2-}$ ), cations ( $\text{Cu}^{2+}$ ,  $\text{Co}^{2+}$ ,  $\text{Ni}^{2+}$ ,  $\text{As}^{3+}$  and  $\text{Cr}^{3+}$ ) and pesticides (thiram, chlopropham, quinalphos, monocrotophos and triazophos), respectively, 500  $\mu\text{M}$ .

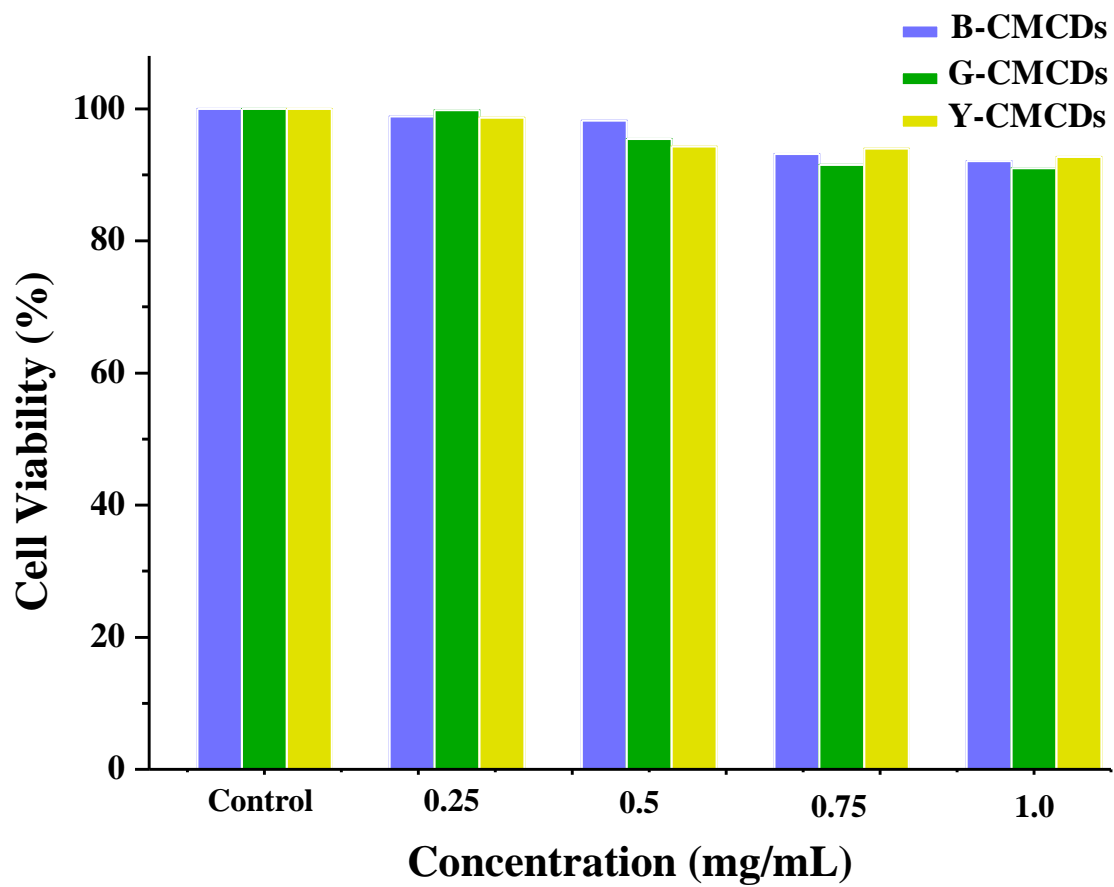

**Figure S11.** Cytotoxicity of B -, G- and Y -CMCDs in the concentration range of (0, 0.25, 0.5, 0.75 and 1.0 mg/mL) on NRK cells.

**Table S1.** Analysis of Hg<sup>2+</sup> ion in spiked canal water and blood serum sample by using G – CMCDs as a probe.

| <b>Sample</b>         | <b>Added conc.<br/>(<math>\mu\text{M}</math>)</b> | <b>Found Conc.<br/>(<math>\mu\text{M}</math>)</b> | <b>Recovery (%)<br/>(n=3)</b> | <b>RSD (%)<br/>(n=3)</b> |
|-----------------------|---------------------------------------------------|---------------------------------------------------|-------------------------------|--------------------------|
| Canal<br>water        | 2.5                                               | 2.49                                              | 99.49                         | 1.11                     |
|                       | 5.0                                               | 5.04                                              | 100.89                        | 0.25                     |
|                       | 7.5                                               | 7.48                                              | 100.55                        | 1.07                     |
| Blood serum<br>sample | 2.5                                               | 2.43                                              | 96.88                         | 0.50                     |
|                       | 5.0                                               | 4.81                                              | 96.97                         | 1.04                     |
|                       | 7.5                                               | 7.46                                              | 100.89                        | 0.13                     |
